# Supplementary material
Source: Springer Nature journal article supplement (https://www.springermedizin.de/resource/supplementary/12968_2011_2032_MOESM7_ESM.pdf/9581188)
Supplement: MOESM7 [file 9581188]

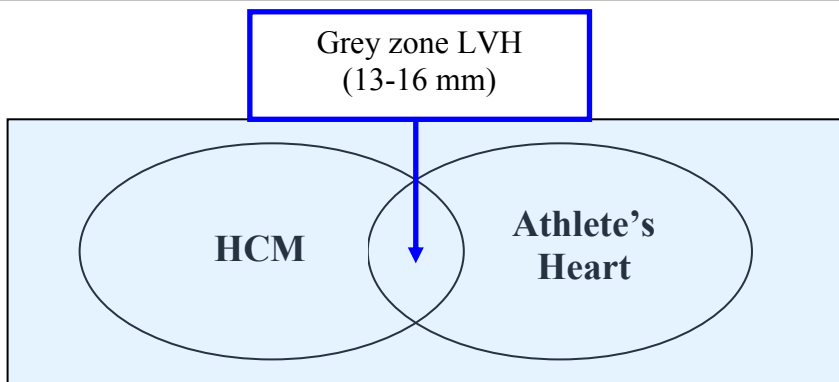

← Cardiovascular symptoms

← First-degree relative with HCM

← ST-depression / deep T-wave inversion

← Pathological Q waves

Isolated Sokolow-Lyon LVH →

LVEDD > 55 mm →

← LVEDD < 45 mm

← LA > 50mm

← LVOTO or bizarre patterns of LVH

← Myocardial Fibrosis

← TDI diastolic dysfunction ( $E' < 8\text{cm}\cdot\text{s}^{-1}$ )

← Identifiable gene mutation

$E/E' > 12$  →

Global longitudinal strain  $\leq -16\%$  →

Normalization of ECG / CMR on  
detraining →

Peak  $\dot{V}O_2 > 50\text{ml}/\text{kg}^{-1}/\text{min}^{-1}$  →
